# Supplementary material for: Dual regulation by microRNA-200b-3p and microRNA-200b-5p in the inhibition of epithelial-to-mesenchymal transition in triple-negative breast cancer
Source: PubMed Central journal article supplement (PMC4599295; doi:10.18632/oncotarget.3184), 2015-03-21
Supplement: oncotarget-06-16638-s001.pdf [file oncotarget-06-16638-s001.pdf]

## SUPPLEMENTARY FIGURE AND TABLE

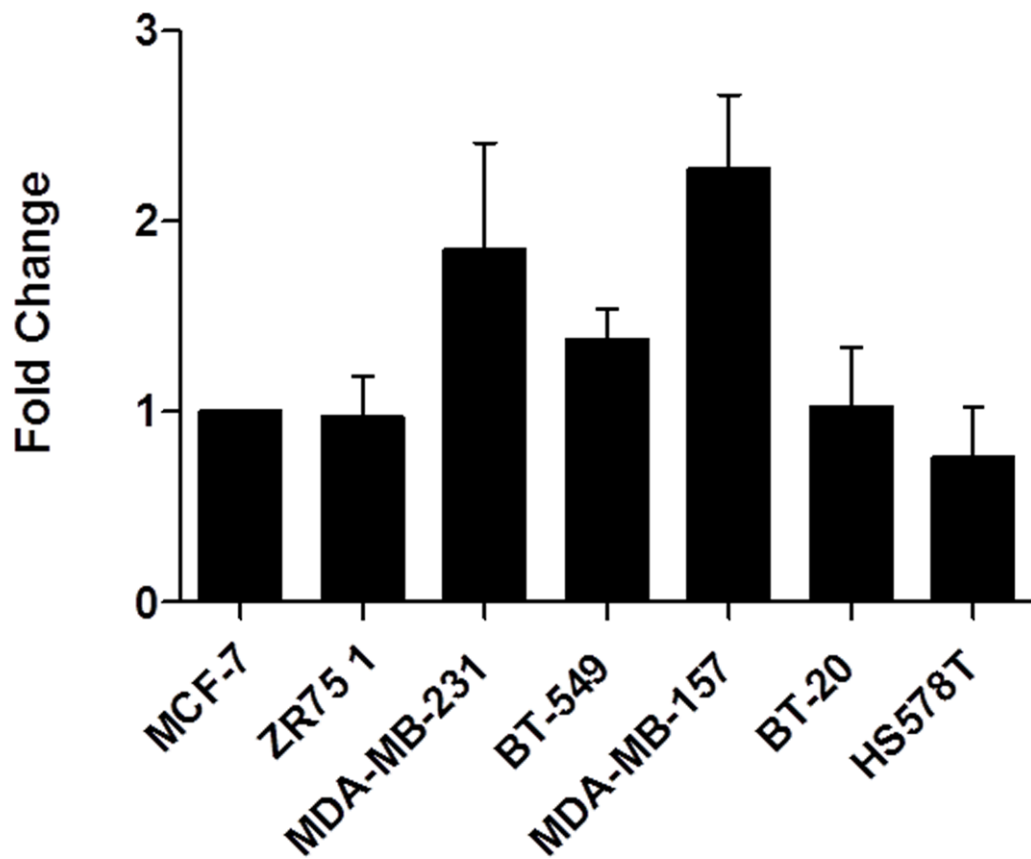

**Supplemental Figure 1: PRKCA Expression Across ER<sup>+</sup> and Triple Negative Breast Cancer Cell Lines.** A cohort of ER<sup>+</sup> (ZR75, MCF-7) and ER<sup>-</sup> (MDA-MB-157, MDA-MB-231, BT-549, Hs578t) breast cancer cell lines were tested by qPCR to determine basal PRKCA expression. B-actin was used for internal normalization and compared to the MCF-7 breast cancer cell line (designated as 1).

**Supplemental Table 1: miR-200b expression in MDA-MB-231 cell line induces gene expression changes in genes associated with EMT**

| Gene Name | LogFc | p-value  | FDR      |
|-----------|-------|----------|----------|
| CDH1      | 2.03  | 8.12E-10 | 7.88E-08 |
| CDH2      | 4.73  | 7.88E-42 | 1.44E-38 |
| COL1A2    | -2.44 | 3.08E-32 | 2.61E-29 |
| EGFR      | 0.39  | 0.000129 | 0.003723 |
| ERBB3     | 1.44  | 2.31E-11 | 2.83E-09 |
| F11R      | 0.95  | 5.17E-14 | 9.25E-12 |
| FN1       | -0.51 | 1.19E-06 | 6.15E-05 |
| IGFBP4    | -0.70 | 2.83E-07 | 1.69E-05 |
| ITGB1     | -0.64 | 1.48E-11 | 1.87E-09 |
| KRT19     | 0.57  | 7.05E-05 | 0.00223  |
| KRT7      | -0.75 | 1.32E-07 | 8.53E-06 |
| MITF      | 0.70  | 0.001347 | 0.026478 |
| MST1R     | 0.77  | 1.95E-08 | 1.44E-06 |
| OCLN      | 1.92  | 1.62E-13 | 2.68E-11 |
| PDGFRB    | -2.13 | 6.46E-08 | 4.38E-06 |
| SERPINE1  | 1.12  | 1.25E-15 | 2.69E-13 |
| TMEM132A  | 0.54  | 0.002551 | 0.043995 |
| TSPAN13   | 2.19  | 4E-06    | 0.000182 |
| WNT5B     | 0.51  | 0.000411 | 0.009961 |
| VIM       | -0.16 | 0.17978  | 0.873841 |
| ZEB1      | -0.97 | 6.87E-12 | 8.87E-10 |
| ZEB2      | -0.72 | 0.001772 | 0.032987 |
